# Supplementary material
Source: publisher site journal article supplement (https://static.cambridge.org/content/id/urn:cambridge.org:id:article:S1047951122000269/resource/name/S1047951122000269supp001.docx)
Supplement: Supplementary file 1 [file S1047951122000269supp001.docx]

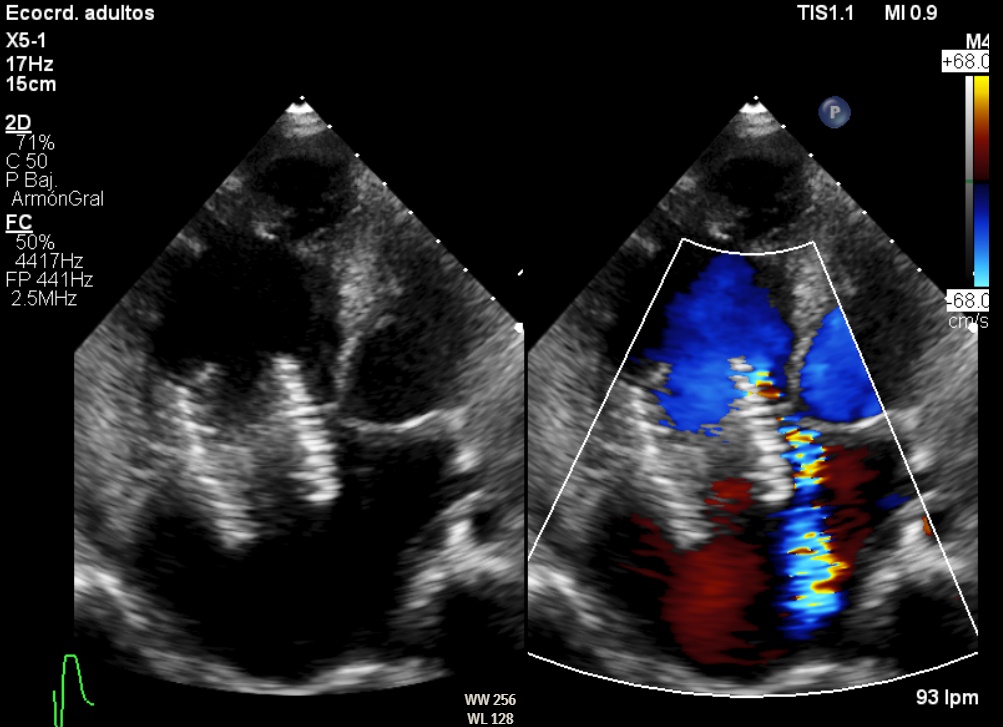
Figure 3 (Periprosthetic leak after percutaneous valve implantation )

.


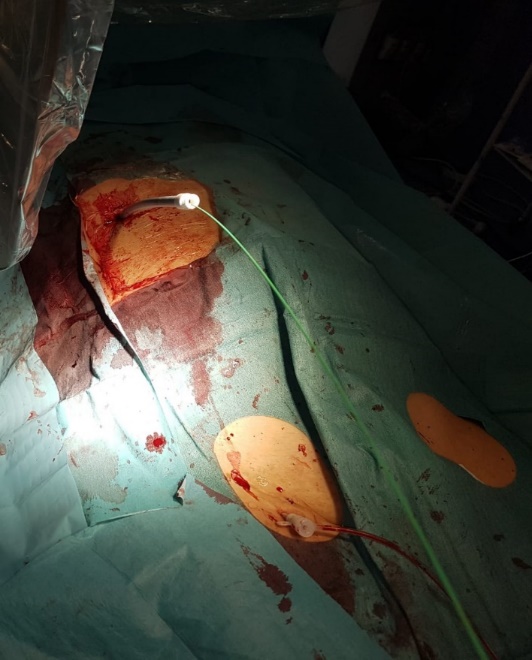


Figure 4 (Transhepatic access needed due to the large right atrium and acute curve from yugular access )
